# Supplementary material for: Dynamics of Neutralizing Antibody Responses Following Natural SARS-CoV-2 Infection and Correlation with Commercial Serologic Tests. A Reappraisal and Indirect Comparison with Vaccinated Subjects
Source: MDPI journal article supplement (doi:10.3390/v13112329), 2021-11-22
Supplement: s1 [file s1]

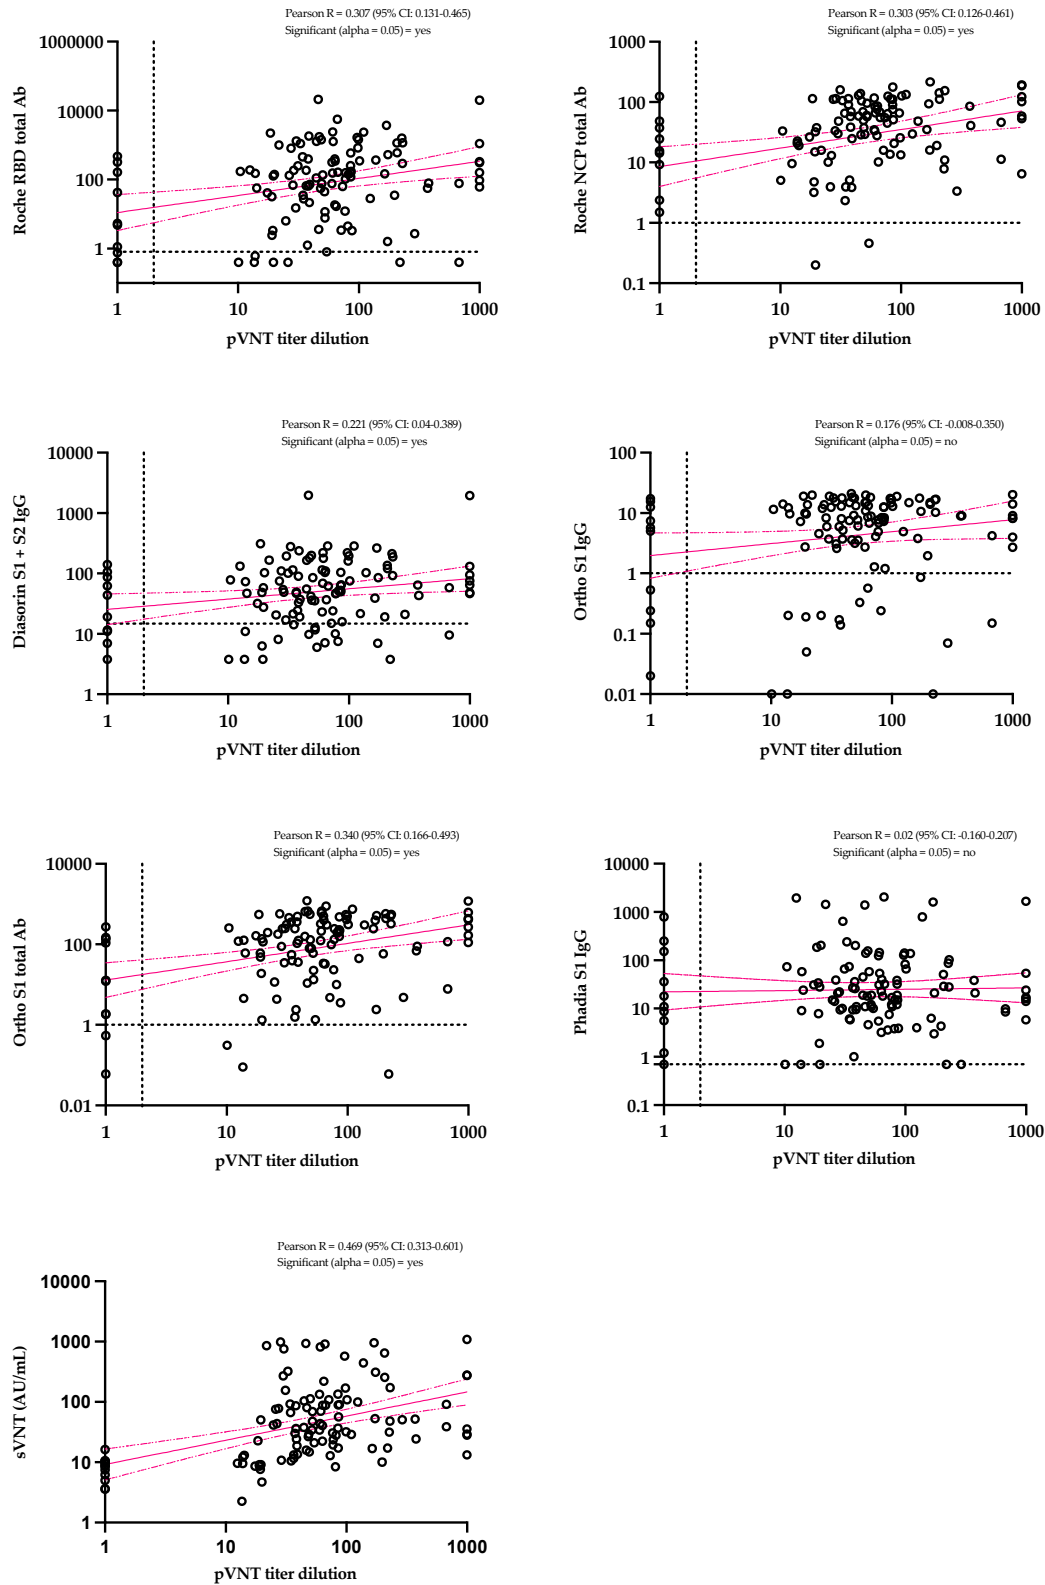

**Figure S1.** Head-to-head comparison of the pVNT to 6 non neutralizing immunoassays and the sVNT technique. Black dotted lines correspond to the positivity threshold of each assay.
